# Supplementary material
Source: MDPI journal article supplement (https://www.mdpi.com/2077-0472/12/10/1568)
Supplement: s1 [file s1]

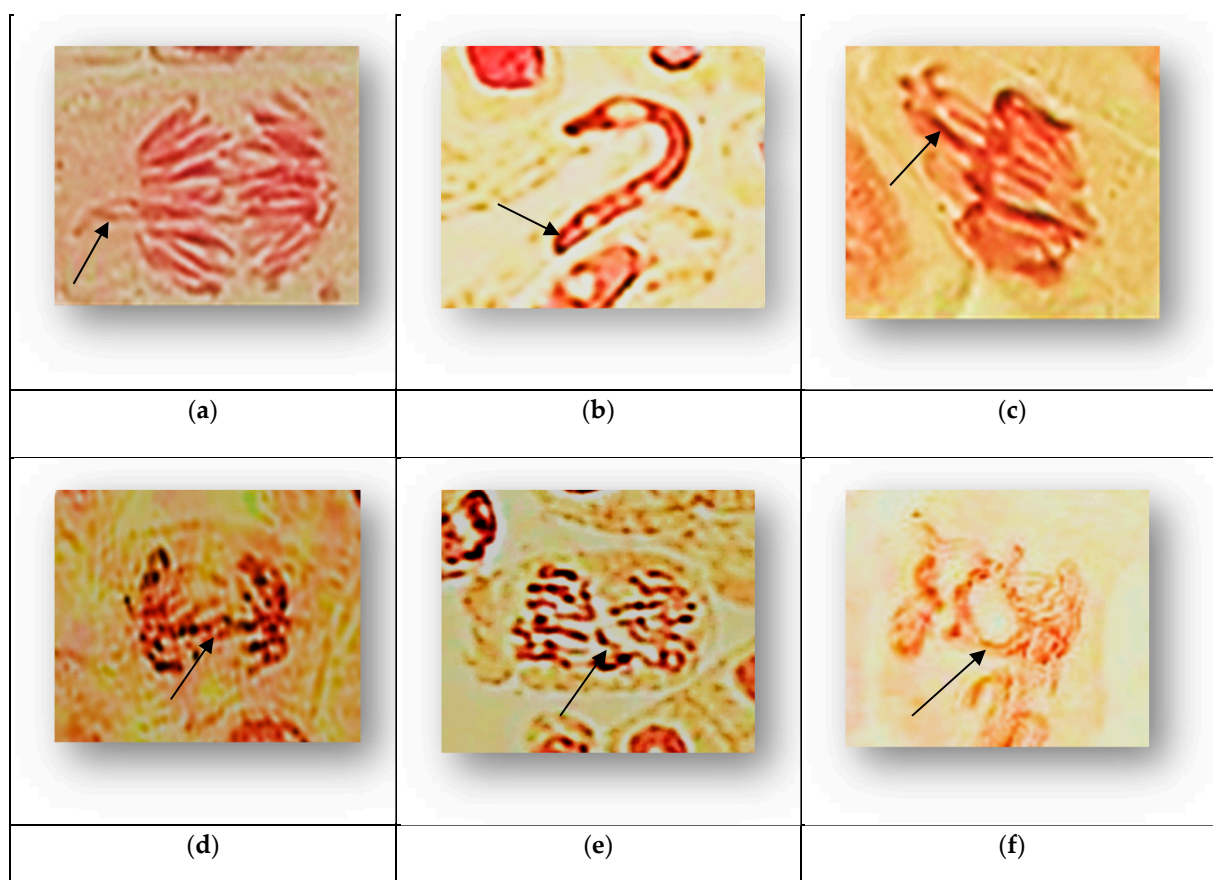

**Figure S1.** Chromosomal aberrations in meristem cells of *Allium cepa* exposed to 75  $\mu\text{M}$   $\text{CdSO}_4 \cdot \text{H}_2\text{O}$ . (a) lagging chromosome formation; (b) aberrant nucleus; (c) unequal distribution of chromatin; (d,e) bridge formation; (f) chromosome displacement at anaphase.
